# Supplementary material
Source: PubMed Central journal article supplement (PMC2863028)
Supplement: NIHMS86620-supplement-1_si_001.pdf [file NIHMS86620-supplement-1_si_001.pdf]

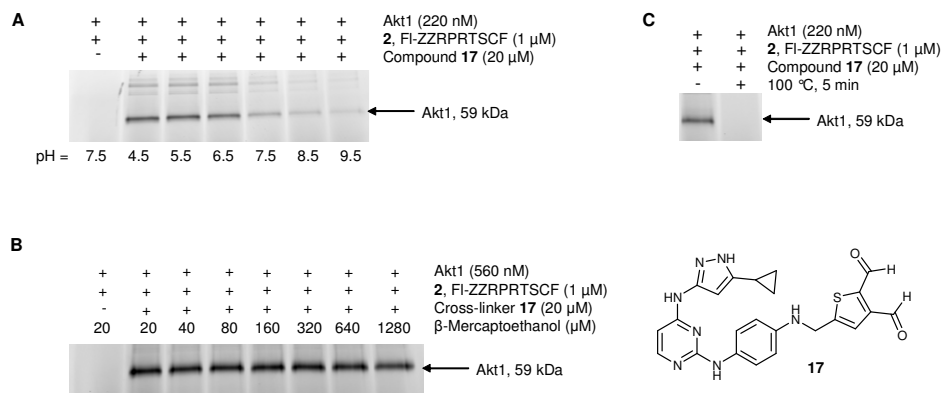

**Supplemental Figure 1.** (A) Cross-linking of Akt1 and fluorescent substrate peptide **2** with cross-linker **17** at different pH values. Akt1 (220 nM) and fluorescent peptide **2** (1 μM) were treated with cross-linker **17** (20 μM) for 20 min at r.t. at different pH values, followed by SDS-PAGE and in gel scanning fluorescence. (excitation at 480 nM, emission collected with a 520 nM band pass filter) (B) Akt1 (560 nM) and fluorescent peptide **2** (1 μM) were treated with cross-linker **17** (20 μM) for 20 min at r.t. in the presence of increasing concentrations of β-mercaptoethanol, followed by SDS-PAGE and in gel fluorescence scanning. (C) Decomposition of the cross-linked product upon heating. Akt1 (220 nM) and fluorescent peptide **2** (1 μM) were treated with cross-linker **17** (20 μM) for 20 min at r.t., then boiled for 5 min, followed by SDS-PAGE and in gel scanning fluorescence. (excitation at 480 nM, emission collected with a 520 nM band pass filter)

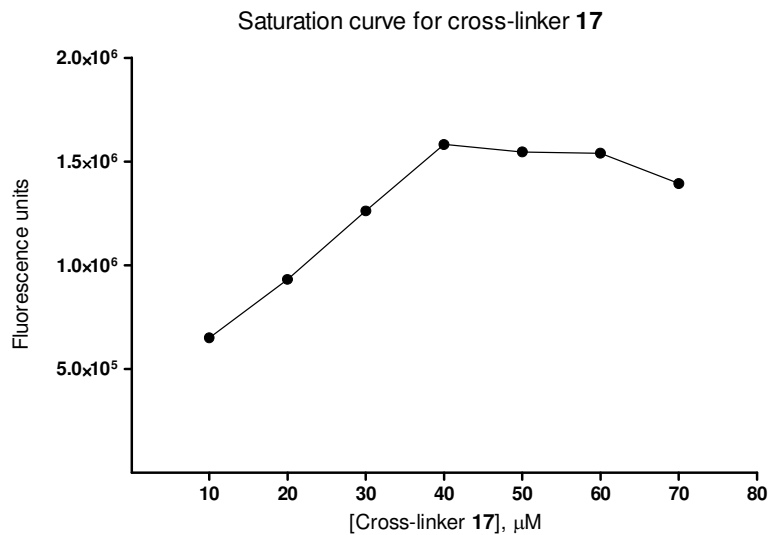

**Supplemental Figure 2.** Concentration dependence for the crosslinking reaction at different concentrations of cross-linker **17**. Akt1 (220 nM) and fluorescent peptide **2** (1  $\mu\text{M}$ ) were treated with indicated concentrations of the cross-linker **17** for 20 min at r.t. at pH 6.5, followed by SDS-PAGE and in gel scanning fluorescence. (excitation at 480 nM, emission collected with a 520 nM band pass filter).

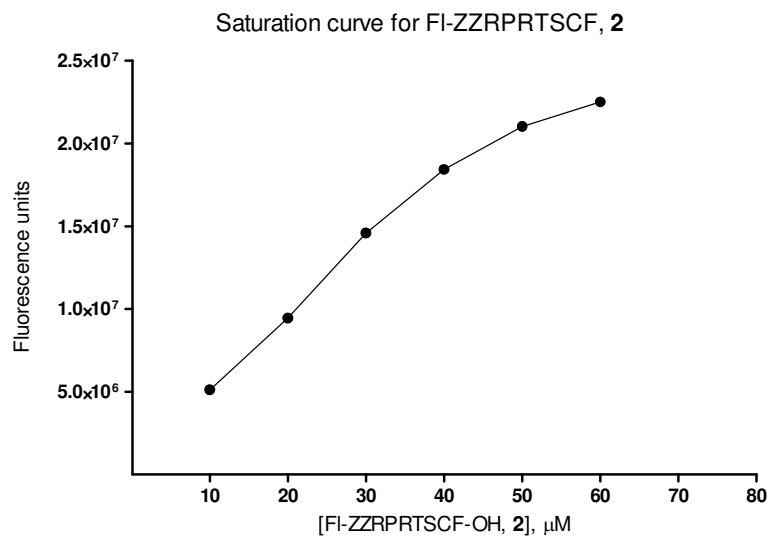

**Supplemental Figure 3.** Concentration dependence for the crosslinking reaction at different concentrations of FI-ZZRPRTSCF, **2**. Akt1 (220 nM) and different concentrations of fluorescent peptide **2** were treated with the cross-linker **17** (20  $\mu\text{M}$ ) for 20 min at r.t., at pH 6.5, followed by SDS-PAGE and in gel scanning fluorescence. (excitation at 480 nM, emission collected with a 520 nM band pass filter).

**Materials.** Unless otherwise noted, all reagents were obtained from commercial suppliers and used without further purification. Sodium cyanoborohydride, butyl lithium, thiophene-2,3-dicarboxaldehyde, ethyleneglycol, N-hydroxysuccinimide, oxalylchloride, N,N-diisopropyl-N-ethylamine, 2-aminoethanol,  $\beta$ -mercaptoethanol (BME), trifluoroacetic acid (TFA). Anhydrous, low-amine N,N-dimethylformamide (DMF) was purchased from EM science. Recombinant AKT1 was purchased from Calbiochem. Fluorescent peptide substrates were prepared as described earlier.<sup>1</sup> Typhoon 9400 was used for all direct in-gel scanning fluorescent measurements (490 nm excitation band, 520 emission filter)

**Kinase assays and binding constant measurements for compounds 3 and 4.** All measurements were performed as described earlier.<sup>2</sup>

Human kinome dendrogram

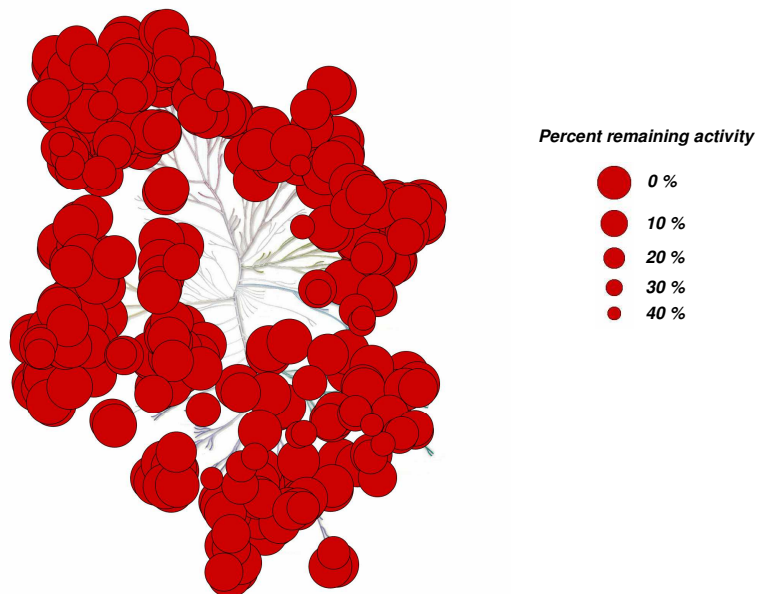

**Supplemental Figure 4.** Small molecule-kinase interaction map for compound **3** that was screened against a panel of 359 human kinases. Kinases found to bind are marked with red circles, where larger circles indicate higher-affinity binding. The kinase dendrogram was adapted and is reproduced with permission from *Science* (<http://www.sciencemag.org/>) and Cell Signaling Technology, Inc. (<http://www.cellsignal.com/>).

**Supplemental Table 1.** Kinase binding interactions for compounds **3** and **4** with 402 kinases.

| <b>Kinase</b> | Compound <b>3</b> , % remaining<br>kinase activity compared to<br>control | Compound <b>4</b> , % remaining<br>kinase activity compared to<br>control |
|---------------|---------------------------------------------------------------------------|---------------------------------------------------------------------------|
| AAK1          | 0.5                                                                       | 0.65                                                                      |
| ABL1          | 4.8                                                                       | 3.2                                                                       |
| ABL1(E255K)   | 12                                                                        | 10                                                                        |
| ABL1(F317I)   | 40                                                                        | 40                                                                        |
| ABL1(F317L)   | 21                                                                        | 21                                                                        |
| ABL1(H396P)   | 4.8                                                                       | 2.8                                                                       |
| ABL1(M351T)   | 3.8                                                                       | 2.1                                                                       |
| ABL1(Q252H)   | 3.5                                                                       | 1.5                                                                       |
| ABL1(T315I)   | 0                                                                         | 0                                                                         |
| ABL1(Y253F)   | 4                                                                         | 2.6                                                                       |
| ABL2          | 2.6                                                                       | 0.5                                                                       |
| ACVR1         | 0.1                                                                       | 0                                                                         |
| ACVR1B        | 0.8                                                                       | 0.8                                                                       |
| ACVR2A        | 0.65                                                                      | 0.85                                                                      |
| ACVR2B        | 1.9                                                                       | 1.4                                                                       |
| ACVRL1        | 3.4                                                                       | 1.6                                                                       |
| ADCK3         | 12                                                                        | 85                                                                        |
| ADCK4         | 2.6                                                                       | 17                                                                        |
| AKT1          | 100                                                                       | 100                                                                       |
| AKT2          | 94                                                                        | 100                                                                       |
| AKT3          | 100                                                                       | 100                                                                       |

|             |      |      |
|-------------|------|------|
| ALK         | 0.45 | 0.15 |
| AMPK-alpha1 | 0.75 | 0.15 |
| AMPK-alpha2 | 0.55 | 0.6  |
| ANKK1       | 1.4  | 0.15 |
| ARK5        | 0.55 | 0.45 |
| ASK1        | 4.5  | 68   |
| ASK2        | 5.1  | 15   |
| AURKA       | 0.7  | 1.5  |
| AURKB       | 0.45 | 0    |
| AURKC       | 0.25 | 0.65 |
| AXL         | 0.2  | 0    |
| BIKE        | 0.2  | 0.4  |
| BLK         | 0.3  | 0.05 |
| BMPR1A      | 2.4  | 1    |
| BMPR1B      | 0    | 0.05 |
| BMPR2       | 0    | 0.55 |
| BMX         | 8.2  | 12   |
| BRAF        | 47   | 88   |
| BRAF(V600E) | 50   | 99   |
| BRK         | 13   | 27   |
| BRSK1       | 2.3  | 1.9  |
| BRSK2       | 4.1  | 0.7  |
| BTK         | 0.65 | 9.3  |
| CAMK1       | 0.55 | 2.4  |
| CAMK1D      | 2.8  | 6.8  |

|        |      |      |
|--------|------|------|
| CAMK1G | 15   | 35   |
| CAMK2A | 4    | 7.4  |
| CAMK2B | 4    | 9    |
| CAMK2D | 7.7  | 7.4  |
| CAMK2G | 15   | 18   |
| CAMK4  | 100  | 49   |
| CAMKK1 | 1.2  | 6.4  |
| CAMKK2 | 4.4  | 1.4  |
| CDC2L1 | 2.8  | 28   |
| CDC2L2 | 3.4  | 40   |
| CDK11  | 7.4  | 96   |
| CDK2   | 0    | 0    |
| CDK3   | 0    | 0    |
| CDK5   | 0    | 0.65 |
| CDK7   | 0    | 0.1  |
| CDK8   | 18   | 88   |
| CDK9   | 0.2  | 0.8  |
| CDKL2  | 0.85 | 0.35 |
| CDKL3  | 0.2  | 0    |
| CDKL5  | 0    | 0.15 |
| CHEK1  | 6.6  | 0    |
| CHEK2  | 3.6  | 2.9  |
| CIT    | 1.9  | 3.3  |
| CLK1   | 0.5  | 0.2  |
| CLK2   | 0.2  | 0.35 |



|          |      |      |
|----------|------|------|
| CLK3     | 3.5  | 2.2  |
| CLK4     | 0.85 | 2.4  |
| CSF1R    | 4.2  | 0.1  |
| CSK      | 20   | 65   |
| CSNK1A1L | 39   | 0.95 |
| CSNK1D   | 10   | 0.05 |
| CSNK1E   | 6.2  | 0.7  |
| CSNK1G1  | 28   | 22   |
| CSNK1G2  | 14   | 0.4  |
| CSNK1G3  | 22   | 3.2  |
| CSNK2A1  | 2    | 1.6  |
| CSNK2A2  | 3    | 0.8  |
| CTK      | 3.9  | 2.6  |
| DAPK1    | 0.45 | 0.75 |
| DAPK2    | 1.8  | 5.4  |
| DAPK3    | 0.6  | 0.9  |
| DCAMKL1  | 3.2  | 0.3  |
| DCAMKL2  | 0.15 | 0.35 |
| DCAMKL3  | 0.2  | 0.15 |
| DDR1     | 0.45 | 2    |
| DDR2     | 1.8  | 2.5  |
| DLK      | 2.7  | 2.1  |
| DMPK     | 1.8  | 0.85 |
| DMPK2    | 7.7  | 1.4  |
| DRAK1    | 0.05 | 0.05 |

|                           |      |      |
|---------------------------|------|------|
| DRAK2                     | 0.4  | 0.3  |
| DYRK1A                    | 0.1  | 0.15 |
| DYRK1B                    | 0.3  | 0.3  |
| DYRK2                     | 0.35 | 0.7  |
| EGFR                      | 16   | 47   |
| EGFR(E746-A750del)        | 18   | 9.6  |
| EGFR(G719C)               | 16   | 45   |
| EGFR(G719S)               | 22   | 50   |
| EGFR(L747-E749del, A750P) | 10   | 7.5  |
| EGFR(L747-S752del, P753S) | 20   | 22   |
| EGFR(L747-T751del,Sins)   | 15   | 16   |
| EGFR(L858R)               | 15   | 18   |
| EGFR(L858R,T790M)         | 12   | 9.2  |
| EGFR(L861Q)               | 13   | 25   |
| EGFR(S752-I759del)        | 19   | 29   |
| EPHA1                     | 1.2  | 3.4  |
| EPHA2                     | 1    | 9.2  |
| EPHA3                     | 0.05 | 1.8  |
| EPHA4                     | 4.6  | 12   |
| EPHA5                     | 0.05 | 1.8  |
| EPHA6                     | 0.45 | 1.3  |
| EPHA7                     | 0.1  | 0.15 |
| EPHA8                     | 20   | 46   |
| EPHB1                     | 0    | 0.25 |
| EPHB2                     | 5    | 14   |

|              |      |      |
|--------------|------|------|
| EPHB3        | 6.7  | 7.9  |
| EPHB4        | 1.1  | 5    |
| EPHB6        | 0.25 | 0.7  |
| ERBB2        | 76   | 100  |
| ERBB3        | 5.2  | 88   |
| ERBB4        | 30   | 59   |
| ERK1         | 0    | 5    |
| ERK2         | 0    | 4.8  |
| ERK3         | 0.2  | 23   |
| ERK4         | 0.3  | 29   |
| ERK5         | 0    | 3.6  |
| ERK8         | 0.1  | 0.1  |
| ERN1         | 0.35 | 1.6  |
| FAK          | 0.2  | 0.5  |
| FER          | 2.1  | 0.25 |
| FES          | 13   | 3.6  |
| FGFR1        | 0.25 | 0.05 |
| FGFR2        | 0.8  | 0.7  |
| FGFR3        | 0.95 | 1.4  |
| FGFR3(G697C) | 1.2  | 0.25 |
| FGFR4        | 5    | 0.85 |
| FGR          | 2    | 1.1  |
| FLT1         | 0.25 | 0.1  |
| FLT3         | 0.1  | 0    |
| FLT3(D835H)  | 0    | 0    |

|                       |      |      |
|-----------------------|------|------|
| FLT3(D835Y)           | 0.35 | 0.35 |
| FLT3(ITD)             | 0    | 0.2  |
| FLT3(K663Q)           | 0.4  | 0.45 |
| FLT3(N841I)           | 0.3  | 0.2  |
| FLT4                  | 0    | 0    |
| FRK                   | 3.8  | 9.2  |
| FYN                   | 1    | 0.85 |
| GAK                   | 0.5  | 3.6  |
| GCN2(Kin.Dom.2,S808G) | 0.2  | 0.1  |
| GRK1                  | 2    | 0.85 |
| GRK4                  | 0    | 0    |
| GRK7                  | 0.3  | 0.2  |
| GSK3A                 | 0    | 0    |
| GSK3B                 | 0.05 | 0.05 |
| HCK                   | 1.8  | 0.5  |
| HIPK1                 | 0.1  | 0.55 |
| HIPK2                 | 0.2  | 0.45 |
| HIPK3                 | 0.35 | 0.2  |
| HIPK4                 | 0    | 0    |
| HPK1                  | 2.1  | 0.85 |
| HUNK                  | 23   | 5    |
| ICK                   | 0.05 | 0.45 |
| IGF1R                 | 0.1  | 0.5  |
| IKK-alpha             | 0.55 | 4.2  |
| IKK-beta              | 1.4  | 44   |

|                              |      |      |
|------------------------------|------|------|
| IKK-epsilon                  | 3.4  | 1.9  |
| INSR                         | 0.4  | 1.9  |
| INSRR                        | 0.25 | 0.4  |
| IRAK1                        | 0.35 | 0.1  |
| IRAK3                        | 0.55 | 2.6  |
| ITK                          | 0.05 | 0.2  |
| JAK1(JH1domain-catalytic)    | 0.65 | 3.4  |
| JAK1(JH2domain-pseudokinase) | 0    | 0    |
| JAK2(JH1domain-catalytic)    | 0.55 | 1.6  |
| JAK3(JH1domain-catalytic)    | 0    | 0.75 |
| JNK1                         | 3.3  | 68   |
| JNK2                         | 3.8  | 92   |
| JNK3                         | 3.8  | 23   |
| KIT                          | 0.55 | 0    |
| KIT(D816V)                   | 0.7  | 0.45 |
| KIT(L576P)                   | 0.15 | 0    |
| KIT(V559D)                   | 0.1  | 0    |
| KIT(V559D,T670I)             | 6.4  | 0.1  |
| KIT(V559D,V654A)             | 16   | 2.2  |
| LATS1                        | 4    | 3    |
| LATS2                        | 3.9  | 1.7  |
| LCK                          | 0.25 | 0.35 |
| LIMK1                        | 1.7  | 1.4  |
| LIMK2                        | 3.8  | 10   |
| LKB1                         | 0    | 0    |

|          |      |      |
|----------|------|------|
| LOK      | 0.25 | 0.05 |
| LTK      | 11   | 3.6  |
| LYN      | 8.4  | 4.1  |
| LZK      | 0.3  | 0.3  |
| MAK      | 0.45 | 20   |
| MAP3K1   | 28   | 0    |
| MAP3K15  | 5.4  | 11   |
| MAP3K2   | 3.4  | 0.7  |
| MAP3K3   | 0.1  | 0.1  |
| MAP3K4   | 36   | 9.3  |
| MAP4K2   | 0.4  | 0.3  |
| MAP4K3   | 1.4  | 1.2  |
| MAP4K4   | 1    | 0.45 |
| MAP4K5   | 0.5  | 0.15 |
| MAPKAPK2 | 46   | 15   |
| MAPKAPK5 | 0.1  | 0    |
| MARK1    | 8.2  | 0.45 |
| MARK2    | 1.6  | 0.85 |
| MARK3    | 0    | 0    |
| MARK4    | 2.6  | 0    |
| MAST1    | 0    | 0    |
| MEK1     | 0.1  | 0.2  |
| MEK2     | 0.1  | 0.2  |
| MEK3     | 0.45 | 0.75 |
| MEK4     | 0.3  | 37   |

|             |      |      |
|-------------|------|------|
| MEK6        | 0.4  | 18   |
| MELK        | 9.6  | 0    |
| MERTK       | 0    | 0    |
| MET         | 0.25 | 0.35 |
| MET(M1250T) | 0.1  | 0.05 |
| MET(Y1235D) | 0.55 | 1.6  |
| MINK        | 0    | 0    |
| MKNK1       | 2.7  | 2.8  |
| MKNK2       | 7    | 14   |
| MLCK        | 0.05 | 0    |
| MLK1        | 0.1  | 0.05 |
| MLK2        | 6.4  | 1.2  |
| MLK3        | 1.4  | 0.15 |
| MRCKA       | 43   | 49   |
| MRCKB       | 39   | 19   |
| MST1        | 1.4  | 1.2  |
| MST1R       | 69   | 54   |
| MST2        | 3.2  | 0.2  |
| MST3        | 0.15 | 0.4  |
| MST4        | 0.15 | 0.1  |
| MUSK        | 0.4  | 0.55 |
| MYLK        | 6    | 8.2  |
| MYLK2       | 0.2  | 0.2  |
| MYO3A       | 1.4  | 1.3  |
| MYO3B       | 9.4  | 1.8  |

|           |      |      |
|-----------|------|------|
| NDR1      | 2    | 3.6  |
| NDR2      | 9.2  | 24   |
| NEK1      | 1.6  | 9.6  |
| NEK2      | 8.2  | 7.2  |
| NEK5      | 0.65 | 0.85 |
| NEK6      | 0    | 0    |
| NEK7      | 0.3  | 0.1  |
| NEK9      | 0.25 | 0.15 |
| NIM1      | 17   | 2.4  |
| NLK       | 4.3  | 33   |
| OSR1      | 2.6  | 9.2  |
| p38-alpha | 82   | 100  |
| p38-beta  | 19   | 100  |
| p38-delta | 0.7  | 100  |
| p38-gamma | 14   | 100  |
| PAK1      | 3.6  | 19   |
| PAK2      | 16   | 38   |
| PAK3      | 3    | 2.4  |
| PAK4      | 0.8  | 2.8  |
| PAK6      | 1.9  | 6.2  |
| PAK7      | 0.2  | 0.25 |
| PCTK1     | 0.25 | 0.15 |
| PCTK2     | 0    | 1.6  |
| PCTK3     | 0    | 0.35 |
| PDGFRA    | 14   | 0.35 |



|                |      |     |
|----------------|------|-----|
| PDGFRB         | 0.05 | 0   |
| PDPK1          | 12   | 17  |
| PFTAIRE2       | 0.2  | 3.4 |
| PFTK1          | 0    | 2.3 |
| PHKG1          | 3.6  | 3.5 |
| PHKG2          | 0.5  | 2.3 |
| PIK3C2B        | 46   | 100 |
| PIK3C2G        | 12   | 97  |
| PIK3CA         | 58   | 98  |
| PIK3CA(C420R)  | 82   | 100 |
| PIK3CA(E542K)  | 99   | 100 |
| PIK3CA(E545A)  | 83   | 100 |
| PIK3CA(E545K)  | 92   | 100 |
| PIK3CA(H1047L) | 65   | 96  |
| PIK3CA(H1047Y) | 77   | 100 |
| PIK3CA(M1043I) | 100  | 98  |
| PIK3CA(Q546K)  | 88   | 100 |
| PIK3CB         | 64   | 100 |
| PIK3CD         | 33   | 87  |
| PIK3CG         | 8.6  | 69  |
| PIK4CB         | 0.15 | 1.8 |
| PIM1           | 49   | 100 |
| PIM2           | 12   | 100 |
| PIM3           | 45   | 100 |
| PIP5K1A        | 5.3  | 0   |

|            |      |      |
|------------|------|------|
| PIP5K2B    | 0.75 | 1.2  |
| PKAC-alpha | 40   | 26   |
| PKAC-beta  | 28   | 26   |
| PKMYT1     | 81   | 52   |
| PKN1       | 2    | 2    |
| PKN2       | 8    | 3.8  |
| PLK1       | 4.8  | 3    |
| PLK2       | 0.35 | 0.25 |
| PLK3       | 0.95 | 5.2  |
| PLK4       | 0.7  | 0.4  |
| PRKCD      | 14   | 4.7  |
| PRKCE      | 9.3  | 1.5  |
| PRKCH      | 10   | 8.6  |
| PRKCQ      | 11   | 26   |
| PRKD1      | 0.85 | 0.55 |
| PRKD2      | 0.05 | 0    |
| PRKD3      | 0.05 | 0    |
| PRKG1      | 11   | 3.8  |
| PRKG2      | 16   | 9.2  |
| PRKR       | 0.45 | 2    |
| PRKX       | 30   | 3.6  |
| PRP4       | 2.4  | 7.5  |
| PYK2       | 1.5  | 1    |
| QSK        | 7.9  | 2.9  |
| RAF1       | 100  | 100  |

|                               |      |      |
|-------------------------------|------|------|
| RET                           | 0    | 0    |
| RET(M918T)                    | 0    | 0    |
| RET(V804L)                    | 0    | 0    |
| RET(V804M)                    | 0    | 0    |
| RIOK1                         | 0.4  | 2.2  |
| RIOK2                         | 0.7  | 0.45 |
| RIOK3                         | 0.3  | 0.45 |
| RIPK1                         | 0.3  | 1.8  |
| RIPK2                         | 4.2  | 12   |
| RIPK4                         | 0.05 | 0.05 |
| ROCK1                         | 4.4  | 4.6  |
| ROCK2                         | 13   | 13   |
| ROS1                          | 0.75 | 1.2  |
| RPS6KA1(Kin.Dom.1-N-terminal) | 0.4  | 0.3  |
| RPS6KA1(Kin.Dom.2-C-terminal) | 0.95 | 35   |
| RPS6KA2(Kin.Dom.1-N-terminal) | 1    | 0.75 |
| RPS6KA2(Kin.Dom.2-C-terminal) | 0.35 | 4.6  |
| RPS6KA3(Kin.Dom.1-N-terminal) | 7.4  | 4.4  |
| RPS6KA4(Kin.Dom.1-N-terminal) | 2.4  | 0.45 |
| RPS6KA4(Kin.Dom.2-C-terminal) | 0.1  | 0.25 |
| RPS6KA5(Kin.Dom.1-N-terminal) | 2.3  | 3    |
| RPS6KA5(Kin.Dom.2-C-terminal) | 5.1  | 14   |
| RPS6KA6(Kin.Dom.1-N-terminal) | 3.9  | 3.5  |
| RPS6KA6(Kin.Dom.2-C-terminal) | 2    | 42   |
| SBK1                          | 0    | 0    |

|        |      |      |
|--------|------|------|
| SgK085 | 0    | 0.4  |
| SgK110 | 2.9  | 2.2  |
| SIK    | 4.3  | 4.2  |
| SIK2   | 8    | 7    |
| SLK    | 0.2  | 0.1  |
| SNARK  | 0.35 | 0.55 |
| SRC    | 0.1  | 0.1  |
| SRMS   | 0.35 | 6.8  |
| SRPK1  | 0.4  | 0    |
| SRPK2  | 1.4  | 1.4  |
| SRPK3  | 0.3  | 0.15 |
| STK16  | 0.25 | 1.4  |
| STK33  | 2.4  | 0.85 |
| STK35  | 9.8  | 3.2  |
| STK36  | 2.5  | 13   |
| STK39  | 0.6  | 2.1  |
| SYK    | 0.6  | 0.15 |
| TAK1   | 0.3  | 0.2  |
| TAO1   | 0    | 3.1  |
| TAOK1  | 0.1  | 0.25 |
| TAOK3  | 0.1  | 0.3  |
| TBK1   | 2.7  | 2.4  |
| TEC    | 28   | 93   |
| TESK1  | 36   | 24   |
| TGFBR1 | 0.5  | 0.5  |

|                              |      |      |
|------------------------------|------|------|
| TGFBR2                       | 0.15 | 0.2  |
| TIE1                         | 0.6  | 0.3  |
| TIE2                         | 1.2  | 0.05 |
| TLK1                         | 0.05 | 0.35 |
| TLK2                         | 0    | 0.2  |
| TNIK                         | 0.2  | 0.05 |
| TNK1                         | 0    | 0.05 |
| TNK2                         | 6.6  | 1.4  |
| TNNI3K                       | 34   | 17   |
| TRKA                         | 0.1  | 0.35 |
| TRKB                         | 0    | 0.1  |
| TRKC                         | 0    | 0.1  |
| TSSK1B                       | 31   | 9.1  |
| TTK                          | 0.55 | 34   |
| TXK                          | 5    | 4.6  |
| TYK2(JH1domain-catalytic)    | 0    | 2.9  |
| TYK2(JH2domain-pseudokinase) | 0.9  | 0.7  |
| TYRO3                        | 22   | 25   |
| ULK1                         | 0.1  | 0    |
| ULK2                         | 0.25 | 0.15 |
| ULK3                         | 0    | 0    |
| VEGFR2                       | 1.2  | 0    |
| WEE1                         | 8.4  | 3.4  |
| WEE2                         | 26   | 5.8  |
| YANK2                        | 25   | 4    |

|       |      |     |
|-------|------|-----|
| YANK3 | 24   | 3.4 |
| YES   | 2.3  | 0.7 |
| YSK1  | 0.25 | 1.5 |
| YSK4  | 0.05 | 0   |
| ZAK   | 5.2  | 2   |
| ZAP70 | 8.2  | 3.2 |

**Supplemental Table 2.** Representative dissociation constants ( $K_d$ ) for 40 representative kinases that displayed binding interactions with the kinase inhibitor **3**.

| Kinase      | $K_d$ , nM | Kinase          | $K_d$ , nM |
|-------------|------------|-----------------|------------|
| ABL1        | 834        | FYN             | 241        |
| ABL1(T315I) | 96         | HCK             | 4990       |
| AKT1        | >40000     | IGF1R           | 1480       |
| AURKA       | 87.5       | JAK2(Kin.Dom.2) | 93.2       |
| AURKB       | 199        | JNK2            | 90.3       |
| AURKC       | 81.8       | JNK3            | 26.1       |
| BRAF(V600E) | >40000     | KIT             | 852        |
| BTK         | 3890       | KIT(D816V)      | 102        |
| CDK2        | 4.62       | LCK             | 870        |
| CDK5        | 27.6       | p38-alpha       | 11800      |
| EGFR        | 7830       | PDPK1           | 5220       |
| EPHA3       | 112        | PIM2            | 1910       |
| ERBB2       | >40000     | RAF1            | >40000     |
| ERBB4       | 8540       | RET             | 152        |
| ERK2        | 49.7       | SRC             | 495        |
| FGFR2       | 294        | SYK             | 200        |
| FGFR3       | 507        | TGFBR1          | 324        |
| FLT3        | 41.4       | TIE2            | 825        |
| FLT3(D835H) | 20.6       | TTK             | 153        |
| FLT4        | 211        | VEGFR2          | 2680       |

-5A

**Crystallization and structure determination of c-Src bound to compound 4.** Chicken c-Src kinase domain was expressed and purified as described before.<sup>3</sup> The c-Src•compound **4** complex was formed in a solution of 250  $\mu$ M kinase domain, 375  $\mu$ M compound **4**, 5% DMSO, 20 mM Tris (pH 7.5), 100 mM NaCl, 1 mM DTT. Crystals were grown overnight at 20°C using the hanging drop vapor diffusion method (1  $\mu$ l protein + 1  $\mu$ l mother liquor) in a mother liquor of 0.1 M MES (pH 6.5), 10% glycerol, 25 mM ammonium acetate, 50 mM sodium acetate. Crystals were cryoprotected in mother liquor and 25 % glycerol, frozen, and stored in liquid nitrogen. Diffraction data were collected at the Advanced Light Source (Lawrence Berkeley National Laboratory) beamline 8.3.1. Data were processed in space group P1 by using DENZO and Scalepack.<sup>4</sup> The structure was solved by molecular replacement by using the kinase domain of human c-Src (PDB code 2SRC)<sup>5</sup> (residues 260–520) without the C helix (residues 298–310) and the activation loop (residues 400–425) as the template in Phaser,<sup>6,3</sup> through the ccp4i interface.<sup>7,4</sup> The structure was built in Coot<sup>8,5</sup>, and refinement of the structure was straightforward and was conducted by using CNS 1.2.<sup>9,10,6,7</sup>



**Supplemental Table 3..** Data Collection and Refinement Statistics

| Data Collection                                             |                                                                                                                                                  |
|-------------------------------------------------------------|--------------------------------------------------------------------------------------------------------------------------------------------------|
| Space Group                                                 | P1                                                                                                                                               |
| Unit Cell                                                   | $a = 63.7 \text{ \AA}$ , $b = 74.5 \text{ \AA}$ , $c = 84.7 \text{ \AA}$<br>$\alpha = 89.1^\circ$ , $\beta = 89.9^\circ$ , $\gamma = 78.4^\circ$ |
| # Molecules/asymmetric unit                                 | 4                                                                                                                                                |
| X-ray source                                                | ALS 8.2.1                                                                                                                                        |
| Wavelength ( $\text{\AA}$ )                                 | 1.00                                                                                                                                             |
| Resolution ( $\text{\AA}$ )                                 | 50-2.35                                                                                                                                          |
| $I / \sigma_I$                                              | 10.0 (4.1)                                                                                                                                       |
| Completeness (%)                                            | 92.8 (93.9)                                                                                                                                      |
| $R_{\text{sym}}$ (%)                                        | 6.3 (21.2)                                                                                                                                       |
| Model Refinement                                            |                                                                                                                                                  |
| Resolution ( $\text{\AA}$ )                                 | 2.35                                                                                                                                             |
| # of reflections $R_{\text{work}}/R_{\text{free}}$          | 48108 / 2572                                                                                                                                     |
| $R_{\text{work}}/R_{\text{free}}$                           | 23.4 / 26.6                                                                                                                                      |
| Rms deviation from ideality in bond length ( $\text{\AA}$ ) | 0.006                                                                                                                                            |
| Rms deviation from ideality in angles ( $^\circ$ )          | 1.3                                                                                                                                              |
| Number of protein atoms in model                            | 8539                                                                                                                                             |
| Number of drug atoms in model                               | 116                                                                                                                                              |
| Number of water molecules in model                          | 220                                                                                                                                              |

Numbers in parentheses refer to the outer resolution shell (2.35  $\text{\AA}$  – 2.43  $\text{\AA}$ )

**General protocol for cross-linking reactions with AKT1.** His<sub>6</sub>-tagged human Akt1, 1  $\mu$ M peptide **2**, and 20  $\mu$ M cross-linker were incubated in 30  $\mu$ L of 25 mM HEPES (pH= 6.5), 150 mM NaCl, 2 mM MgCl<sub>2</sub>, 20  $\mu$ M BME for 20 min at rt. After 20 min, 6  $\mu$ L of 6x loading buffer was added to quench the reactions. The sample mixtures (10  $\mu$ L) were resolved by 12% SDS-PAGE, followed by SDS-PAGE and direct in gel scanning fluorescence measurements (490 nm excitation band, 520 nm emission band).

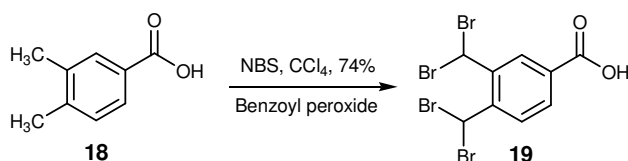

**Synthesis of compound 19.** Compound **19** was synthesized according to the previously reported method.<sup>11</sup> 3,4-dimethylbenzoic acid (11.76 g, 78 mmol), N-Bromosuccinimide (57 g, 322 mmol) and benzoyl peroxide (1.8 g, 7.4 mmol) were refluxed in carbon tetrachloride (170 mL) for 16h. Solids were filtered and washed with Et<sub>2</sub>O (2 $\times$ 150 mL) followed by benzene (2 $\times$ 150 mL). Organic filtrates were evaporated, and dissolved in 10% Na<sub>2</sub>CO<sub>3</sub> (200 mL). Aqueous phase was washed with CH<sub>2</sub>Cl<sub>2</sub> (2 $\times$ 100 mL), acidified to pH 1 with HCl and extracted with EtOAc (2 $\times$ 200 mL). Organic layer was washed with brine (200 mL), dried with MgSO<sub>4</sub> and concentrated *in vacuo* affording tetrabromoacid **19** (27.3 g, 74% yield).

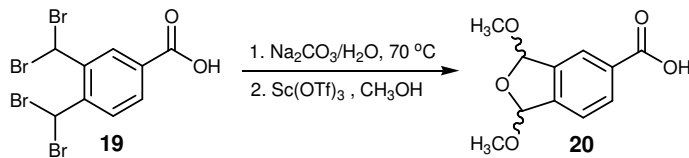

**Synthesis of compound 20.** Tetrabromoacid **19** (26g, 56 mmol) was dissolved in 10 % Na<sub>2</sub>CO<sub>3</sub> (200 mL) and kept at 70 °C for 4h. Reaction mixture was cooled down to 0 °C and acidified with HCl to pH 1 and extracted with EtOAc (2 $\times$ 200 mL). Organic layer washed with brine (200mL),

dried with  $\text{MgSO}_4$  and concentrated *in vacuo*. Yellow solids were dissolved in 150 mL  $\text{CH}_3\text{OH}$  and treated with  $\text{Sc}(\text{OTf})_3$  (1g, 2 mmol) at r.t. overnight. Resulting white solids were filtered affording acid **20** (4.3g) as a 1:1 mixture of isomers, 34% combined yield over two steps.  $^1\text{H}$  NMR (400 MHz, DMSO)  $\delta$  13.12 (s, 1H), 7.99 (d, 1H,  $J = 8\text{Hz}$ ), 7.89 (s, 1H), 7.49 (d, 1H,  $J = 8\text{Hz}$ ), 6.05 (s, 2H), 3.31 (s, 3H), 3.30 (s, 3H).  $^{13}\text{C}$  NMR (100 MHz, DMSO)  $\delta$  167.4, 143.2, 139.5, 132.9, 131.4, 124.7, 124.0, 105.2, 105.1, 54.8, 54.7. MS calculated for  $\text{C}_{11}\text{H}_{12}\text{O}_5$  224.07, found 193.05 (-  $\text{OCH}_3$ )

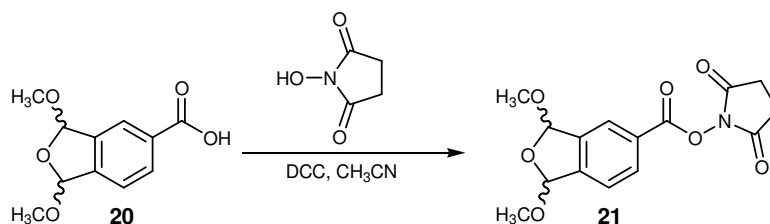

**Synthesis of compound 21.** Solution of acid **20** (2g, 8.9 mmol) in  $\text{CH}_3\text{CN}$  (40 mL) was treated with N-hydroxysuccinimide (1.03g, 8.9 mmol) followed by DCC (1.84g, 8.9 mmol). Reaction mixture was stirred for 1h at room temperature and filtered. Filtrates were concentrated *in vacuo*, dissolved in EtOAc (10 mL) and purified (Hexanes : EtOAc = 100:0  $\rightarrow$  0:100) affording succinimide ester **21** (2.66g, 93% yield).  $^1\text{H}$  NMR (400 MHz,  $\text{CDCl}_3$ )  $\delta$  8.17 (d, 1H,  $J = 8\text{Hz}$ ), 8.13 (s, 1H), 7.51 (d, 1H,  $J = 8\text{Hz}$ ), 6.05 (s, 1H), 6.03 (s, 1H), 3.42 (s, 3H), 3.40 (s, 3H).  $^{13}\text{C}$  NMR (100 MHz,  $\text{CDCl}_3$ )  $\delta$  169.3, 161.5, 145.1, 139.7, 132.3, 127.0, 125.9, 124.0, 105.2, 105.1, 54.9, 54.8, 25.8. MS calculated for  $\text{C}_{15}\text{H}_{15}\text{NO}_7$  321.08, found 290.06 (-  $\text{OCH}_3$ )

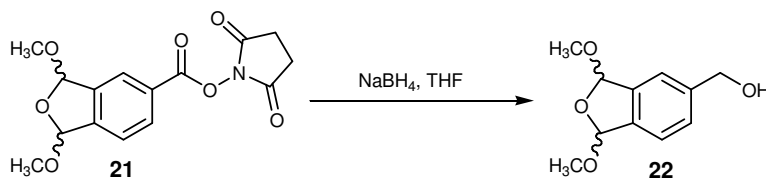

**Synthesis of compound 22.** Solution of succinimide ester **21** (762 mg, 2.37 mmol) in THF (30 mL) was treated with solid NaBH<sub>4</sub> (0.45 g, 11.85 mmol) and stirred at ambient temperature overnight and then refluxed for 1h. Reaction mixture was quenched with 1N NaOH (20 mL) and refluxed for 1h. Reaction mixture was diluted with water (30 mL) and EtOAc (30 mL). Aqueous phase was extracted with the additional amount of EtOAc (30 mL), combined organic extracts were washed with brine (50 mL), dried with MgSO<sub>4</sub>, filtered and concentrated *in vacuo* and purified (Hexanes : EtOAc = 100:0 → 25:75) affording alcohol **22** (0.255 g, 51% yield). <sup>1</sup>H NMR (400 MHz, CDCl<sub>3</sub>) δ 7.40-7.30 (m, 3H), 6.02 (s, 1H), 5.99 (s, 1H), 4.66 (s, 2H), 3.42 (s, 3H), 3.39 (s, 3H). <sup>13</sup>C NMR (100 MHz, CDCl<sub>3</sub>) δ 143.3, 139.0, 137.8, 128.6, 123.3, 121.4, 105.59, 105.57, 64.9, 54.6, 54.3. MS calculated for C<sub>11</sub>H<sub>14</sub>O<sub>4</sub> 210.09, found 179.07 (- OCH<sub>3</sub>).

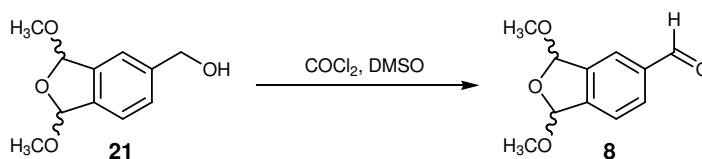

**Synthesis of aldehyde 8.** Solution of DMSO (0.8g, 10 mmol) in CH<sub>2</sub>Cl<sub>2</sub> (50 mL) was cooled down to -78 °C and treated dropwise with (COCl)<sub>2</sub> (0.655g, 5.15 mmol). Stirring continued for 10 min at -78 °C, followed by dropwise addition of solution of alcohol **21** (0.5g, 2.4 mmol) in CH<sub>2</sub>Cl<sub>2</sub> (20 mL). After 15 min NEt<sub>3</sub> (0.784g, 7.6 mmol) was added to the reaction mixture and cooling was removed. After 30 min of stirring, reaction mixture was quenched with saturated sodium bicarbonate (40 mL). Organic layers were separated, aqueous extracted with CH<sub>2</sub>Cl<sub>2</sub> (30 mL), dried with MgSO<sub>4</sub>, filtered, evaporated and purified (Hex:EtOAc = 100:0 → 40:60). Aldehyde **8** (330 mg, 62% yield). <sup>1</sup>H NMR (400 MHz, CDCl<sub>3</sub>) δ 10.03 (s, 1H), 7.93 (d, 1H, *J* = 7.6 Hz), 7.88 (s, 1H), 7.52 (d, 1H, *J* = 7.6 Hz), 6.06 (s, 2H), 3.46 (s, 3H), 3.44 (s, 3H). <sup>13</sup>C NMR (100 MHz, CDCl<sub>3</sub>) δ 191.5, 144.5, 139.8, 138.2, 131.5, 124.8, 124.0, 105.3, 105.2, 55.0, 54.8. MS calculated for C<sub>11</sub>H<sub>12</sub>O<sub>4</sub> 208.09, found 177.16 (- OCH<sub>3</sub>).

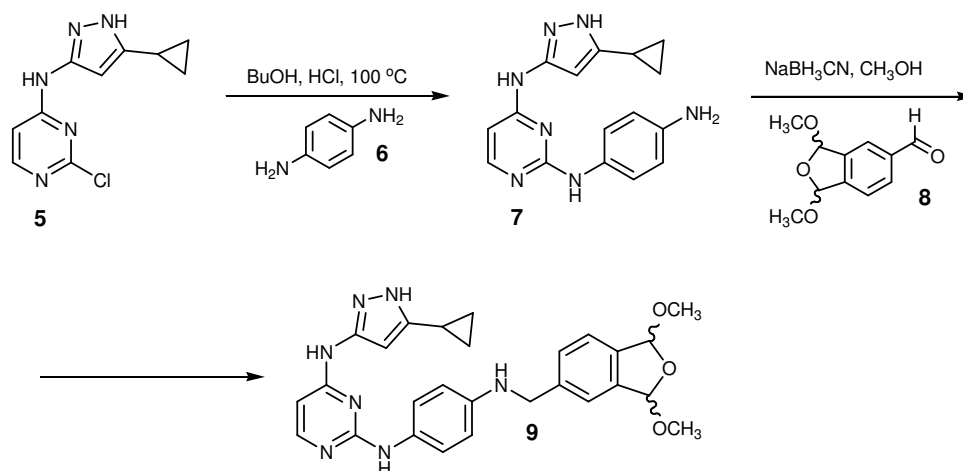

**Synthesis of compound 9.** (a) Synthesis of intermediate **7**. Pyrimidine monochloride **5** (1.6 g, 6.8 mmol) and *p*-phenylenediamine **6** (0.74 g, 6.8 mmol) were dissolved in BuOH (60 mL) followed by the addition of concentrated HCl (0.1 mL). Resulting mixture was kept at 100 °C overnight. Purple precipitates were collected by filtration, washed with 20 mL of BuOH and dried at 50 °C under vacuum, affording amine **7** (1.5 g, 73% yield) which was used in the next step without further purification. MS calculated for C<sub>16</sub>H<sub>17</sub>N<sub>7</sub> 307.15, found 308.17.

(b) Synthesis of compound **9**. Amine **7** (0.06 g, 195 μmol) and aldehyde **8** (0.035g, 168 μmol) were dissolved in CH<sub>3</sub>OH (5mL) and treated with solid NaBH<sub>3</sub>CN (0.01g, 168 μmol) and stirred at ambient temperature overnight. Reaction mixture was evaporated and purified (CH<sub>2</sub>Cl<sub>2</sub> : CH<sub>3</sub>OH = 100:0 → 92:8 (1% NEt<sub>3</sub>)). Compound **9** (0.064g, 66% yield). <sup>1</sup>H NMR (400 MHz, CDCl<sub>3</sub>) δ 8.86 (bs, 1H), 7.80 (m, 1H), 7.67 (bs, 1H), 7.32 (m, 3H), 7.14 (m, 2H), 6.49 (s, 1H), 6.47 (s, 1H), 6.20 (m, 2H), 4.25 (m, 2H), 1.76 (m, 1H), 0.85 (m, 2H), 0.58 (m, 2H). <sup>13</sup>C NMR (100 MHz, CDCl<sub>3</sub>) δ 160.4, 160.1, 155.6, 144.9, 142.1, 139.1, 137.5, 129.5, 129.2, 129.1, 124.0, 123.3, 121.8, 113.4, 106.7, 105.7, 97.4, 54.9, 54.6, 46.8, 8.9, 8.2. MS calculated for C<sub>27</sub>H<sub>29</sub>N<sub>7</sub>O<sub>3</sub> 499.23, found 500.14 (M<sup>+</sup>).

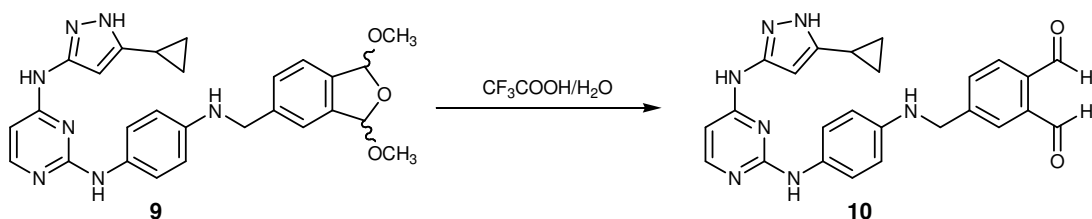

**Synthesis of cross-linker 10.** Dimethoxyacetal **9** (0.054g, 0.108 mmol) was treated with H<sub>2</sub>O (2 mL) and CF<sub>3</sub>COOH (2 mL). Resulting mixture was stirred 1h at ambient temperature and evaporated. HPLC purification CH<sub>3</sub>CN/H<sub>2</sub>O (0.1% TFA) followed by lyophilization gave cross-linker **10** (0.024g, 51% yield). <sup>1</sup>H NMR (400 MHz, DMSO) δ 12.35 (bs, 1H), 11.06 (bs, 1H), 10.47 (s, 1H), 10.40 (s, 1H), 10.25 (bs, 1H), 7.94 (m, 2H), 7.83 (s, 2H), 7.08 (bs, 3H), 6.61 (bs, 3H), 6.30 (bs, 1H), 2.46 (bs, 2H), 1.13 (4H), 0.88 (bs, 1H). <sup>13</sup>C NMR (100 MHz, CDCl<sub>3</sub>) δ 193.7, 193.4, 160.0, 159.6, 159.3, 154.0, 148.0, 146.8, 137.1, 135.8, 132.8, 131.5, 128.7, 126.5, 119.0, 116.0, 113.1, 46.3, 9.2, 8.6. MS calculated for C<sub>25</sub>H<sub>23</sub>N<sub>7</sub>O<sub>2</sub> 453.19, found 454.11.

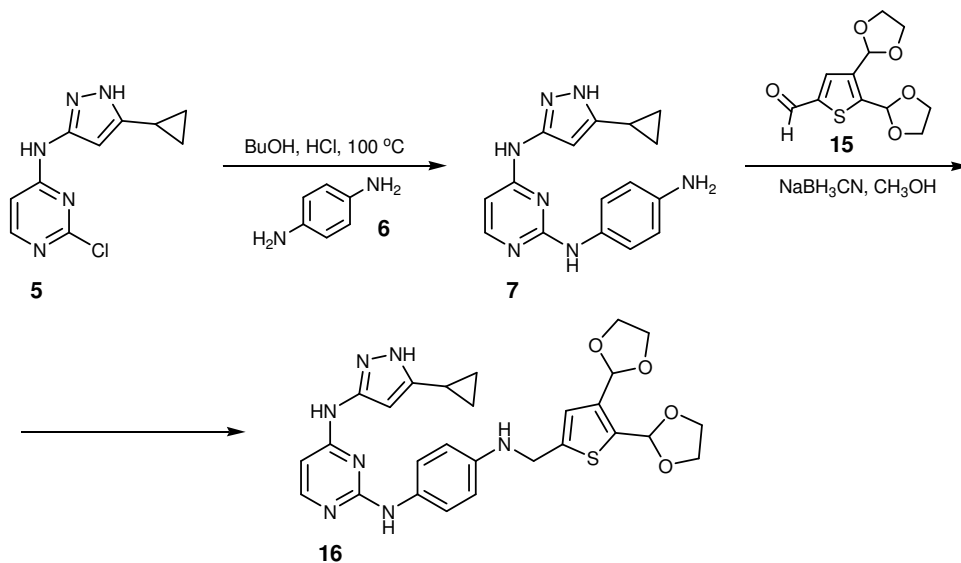

**Synthesis of compound 16.** (a) Synthesis of intermediate **7**. Pyrimidine monochloride **5** (1.6 g, 6.8 mmol) and *p*-phenylenediamine **6** (0.74 g, 6.8 mmol) were dissolved in BuOH (60 mL) followed by the addition of concentrated HCl (0.1 mL). Resulting mixture was kept at 100 °C overnight. Purple precipitates were collected by filtration, washed with 20 mL of BuOH and dried



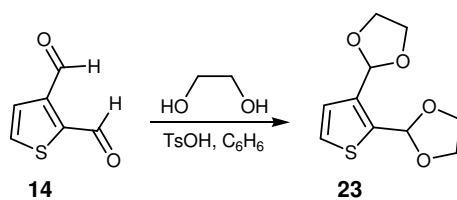

**Synthesis of compound 23.** 2,3-Bis(1,3-dioxolan-2-yl)thiophene **23** was synthesized according to the previously published procedure.<sup>12</sup> 2,3-Thiophene dicarboxaldehyde **14** (5.35g, 38 mmol), p-toluenesulfonic acid monohydrate (0.1 g, ) and ethylene glycol (11.73 g, 190 mmol) were dissolved in benzene (80 mL). Resulting mixture was refluxed for 2h and water was collected in a Dean-Stark trap. Reaction mixture was washed with 5% Na<sub>2</sub>CO<sub>3</sub> (100 mL), aqueous layer was extracted once with EtOAc (100 mL), dried with MgSO<sub>4</sub>, filtered and evaporated. Purification of the resulting oily residue (Hexanes/EtOAc) afforded 2,3-Bis(1,3-dioxolan-2-yl)thiophene **23** (7g, 85% yield).

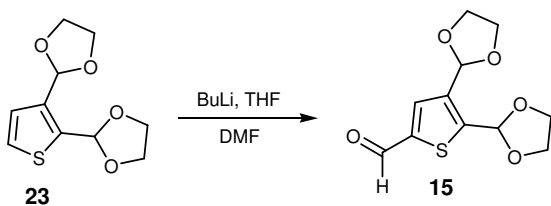

**Synthesis of compound 15.** 2,3-Bis(1,3-dioxolan-2-yl)thiophene **23** (2.6 g, 11.40 mmol) in THF (50 mL) was cooled down to -78 °C and treated dropwise with BuLi (12.5 mmol). Temperature was raised to 0 °C and reaction mixture was stirred for additional 30 min. After 30 min of stirring, DMF was added (12.5 mmol, 0.971 mL). Cooling was removed and the reaction mixture stirred at ambient temperature for 30 min followed by quenching with H<sub>2</sub>O (50 mL). Layers were separated, and aqueous layer extracted with Et<sub>2</sub>O (100 mL). Organic extracts were dried with MgSO<sub>4</sub>, filtered and evaporated. Purification of the resulting residue (Hexanes/EtOAc) afforded aldehyde **15** (2.2 g, 75% yield). <sup>1</sup>H NMR (400 MHz, CDCl<sub>3</sub>) δ 9.80 (s, 1H), 7.74 (s, 1H), 6.32 (s, 1H), 5.98 (s, 1H), 4.10-4.05 (m, 4H), 4.05-3.95 (m, 4H). <sup>13</sup>C NMR (100 MHz, CDCl<sub>3</sub>) δ 183.4,



150.5, 142.2, 138.8, 136.1, 98.8, 98.6, 65.8, 65.5. MS calculated for C<sub>11</sub>H<sub>12</sub>O<sub>5</sub>S 256.04, found 257.03.

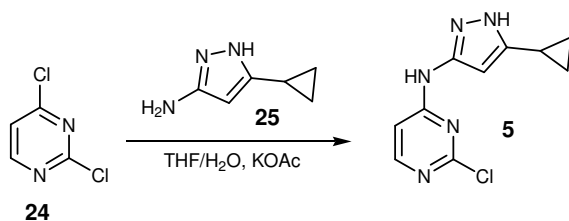

**Synthesis of compound 5.** 2,4-dichloropyrimidine **24** (3.2 g, 21.6 mmol) and 5-cyclopropyl-2H-pyrazol-3-ylamine **25** (2.65g, 21.5 mmol) were dissolved in a 1:1 mixture of THF and H<sub>2</sub>O (140 mL) and treated with KOAc (30 eq., 64 g) and kept at 55 °C for 48h. Layers were separated, organic layer was evaporated, dissolved in CH<sub>2</sub>Cl<sub>2</sub> (30 mL) and kept at -20 °C for 3h. Precipitated pyrimidine chloride **5** was collected by filtration. Filtrates were evaporated and dissolved in CH<sub>2</sub>Cl<sub>2</sub> (25 mL) and kept at -20 °C for another 3h and filtered. Combined solids were dissolved in CHCl<sub>3</sub> : CH<sub>3</sub>OH 10:1 (25 mL) and purified (CHCl<sub>3</sub>/CH<sub>3</sub>OH), affording compound **5** (46% yield, 2.32g). <sup>1</sup>H NMR (400 MHz, DMSO) δ 12.14 (s, 1H), 10.23 (s, 1H), 8.10 (s, 1H), 1.84 (m, 1H), 0.88 (m, 2H), 0.64 (m, 2H). <sup>13</sup>C NMR (100 MHz, DMSO) δ 161.4, 160.7, 160.0, 153.9, 148.6, 147.8, 146.8, 8.4, 8.2. MS calculated for C<sub>10</sub>H<sub>10</sub>ClN<sub>5</sub> 235.06 (M<sup>+</sup>), found 236.15 (M<sup>+</sup>).

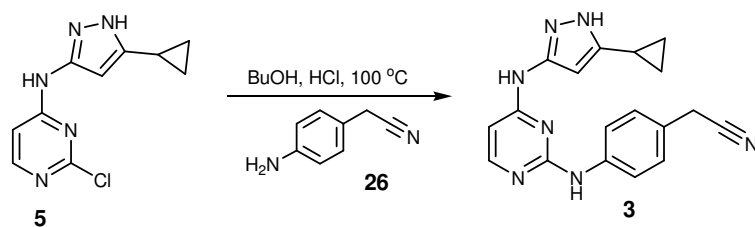

**Synthesis of compound 3.** Pyrimidine monochloride **5** (0.2 g, 0.85 mmol) and p-aminobenzonitrile **26** (0.112 g, 0.85 mmol) were dissolved in BuOH (8 mL) followed by the addition of concentrated HCl (0.1 mL). Resulting reaction mixture was kept at 100 °C overnight. Solid precipitates were collected by filtration washed with BuOH (8 mL) and dried under vacuum affording compound **3** (0.23 g, 86% yield). <sup>1</sup>H NMR (400 MHz, DMSO) δ 11.46 (s, 1H), 10.98 (s, 1H), 7.96 (m, 1H), 7.48 (bs, 2H), 7.37 (d, 2H, *J* = 8 Hz), 6.49 (bs, 1H), 6.01 (bs, 1H), 4.03 (s,

2H), 1.82 (m, 1H), 0.89 (m, 2H), 0.52 (bs, 2H).  $^{13}\text{C}$  NMR (100 MHz, DMSO)  $\delta$  160.3, 153.2, 147.6, 145.8, 143.2, 136.5, 129.4, 124.4, 119.8, 100.1, 94.1, 22.6, 8.8, 7.4. MS calculated for  $\text{C}_{18}\text{H}_{17}\text{N}_7$  331.15, found 332.11.

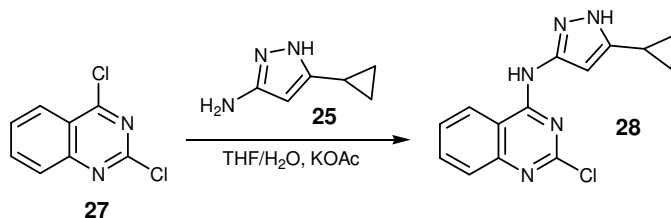

**Synthesis of compound 28.** Solution of pyrazoloamine **25** (0.267 g, 2.17 mmol) and 2,4-dichloroquinazoline **27** (0.432 g, 2.17 mmol) in EtOH (10 mL) was treated with EtN(i-Pr)<sub>2</sub> (3 eq., 1.13 mL) and stirred overnight. Resulting white precipitate was collected by filtration and dried, affording compound **28** (0.476 g, 76% yield).  $^1\text{H}$  NMR (400 MHz, DMSO)  $\delta$  12.31 (bs, 1H), 10.74 (s, 1H), 8.58 (d, 1H,  $J = 8$  Hz), 7.79 (dd, 1H,  $J = 8$  Hz, 7.2 Hz), 7.65 (d, 1H,  $J = 8.4$  Hz), 7.52 (dd, 1H,  $J = 7.6$  Hz, 7.6 Hz), 3.31 (bs, 1H), 1.91 (m, 1H), 0.92 (m, 2H), 0.69 (m, 2H).  $^{13}\text{C}$  NMR (100 MHz, DMSO)  $\delta$  159.2, 157.0, 151.4, 147.3, 146.4, 134.6, 127.4, 127.2, 124.3, 114.1, 96.0, 8.4, 7.6. MS calculated for  $\text{C}_{14}\text{H}_{12}\text{ClN}_5$  285.08, found 286.03.

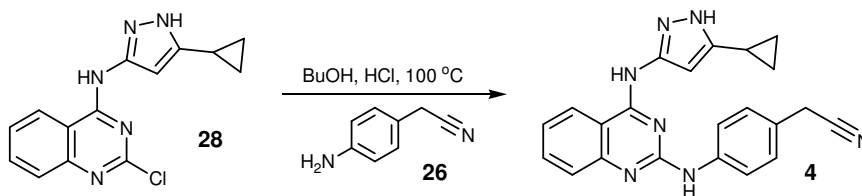

**Synthesis of compound 4.** Quinazoline monochloride **28** (0.2 g, 0.7 mmol) and p-aminobenzonitrile **26** (0.093 g, 0.7 mmol) were dissolved in BuOH (8 mL) followed by the addition of concentrated HCl (0.1 mL). Resulting reaction mixture was kept at 100 °C overnight. Solid precipitates were collected by filtration washed with BuOH (8 mL) and dried under vacuum affording compound **4** (0.197 g, 74% yield).  $^1\text{H}$  NMR (400 MHz, DMSO)  $\delta$  11.43 (s, 1H), 10.81 (s, 1H), 8.60 (d, 1H,  $J = 8$  Hz), 7.83 (dd, 1H,  $J = 8$  Hz, 7.6 Hz), 7.57 (d, 1H,  $J = 8.4$  Hz), 7.53 (d, 2H,  $J = 8.4$  Hz), 7.44 (dd, 1H,  $J = 7.6$  Hz, 8 Hz), 7.38 (d, 2H,  $J = 8.4$  Hz), 6.14 (bs, 1H), 4.04 (s,

2H), 1.82 (m, 1H), 0.93 (m, 2H), 0.54 (m, 2H). <sup>13</sup>C NMR (100 MHz, DMSO) δ 159.7, 159.4, 158.8, 152.6, 146.9, 146.2, 136.7, 136.2, 129.4, 125.6, 125.2, 125.0, 119.8, 118.2, 111.0, 96.2, 22.7, 8.5, 7.5. LRMS calculated for C<sub>22</sub>H<sub>19</sub>N<sub>7</sub> 381.17, found 382.08.

Full list of sixteen or more authors for the following references in the main text is included:

**3(c)** Ptacek J, Devgan G, Michaud G, Zhu H, Zhu X, Fasolo J, Guo H, Jona G, Breikreutz A, Sopko R, McCartney R.R, Schmidt M.C, Rachidi N, Lee S.J, Mah A.S, Meng L, Stark M.J, Stern D.F, De Virgilio C, Tyers M, Andrews B, Gerstein M, Schweitzer B, Predki P.F, Snyder M., *Nature*, **2005**, *438*, 679–684.

**21(a)** Fabian M.A, Biggs W.H III, Treiber D.K, Atteridge C.E, Azimioara M.D, Benedetti M.G, Carter TA, Ciceri P, Edeen PT, Floyd M, Ford JM, Galvin M, Gerlach JL, Grotzfeld RM, Herrgard S, Insko DE, Insko MA, Lai AG, Lélías JM, Mehta SA, Milanov ZV, Velasco AM, Wodicka LM, Patel HK, Zarrinkar PP, Lockhart DJ., *Nat. Biotechnol.* **2005**, *23*, 329-336.

**21(b)** Karaman MW, Herrgard S, Treiber DK, Gallant P, Atteridge CE, Campbell BT, Chan KW, Ciceri P, Davis MI, Edeen PT, Faraoni R, Floyd M, Hunt JP, Lockhart DJ, Milanov ZV, Morrison MJ, Pallares G, Patel HK, Pritchard S, Wodicka LM, Zarrinkar PP., *Nat. Biotechnol.*, **2008**, *26*, 127-132.

References:

- 
- (1) Maly, D.J.; Allen, J.A.; Shokat, K.M. *J. Am. Chem. Soc.*, **2004**, *126*, 9160-9161.
  - (2) (a) Fabian, M.A. Biggs, W.H III, Treiber, D.K, Atteridge, C.E, Azimioara, M.D, Benedetti, M.G., Carter, T.A., Ciceri P, Edeen PT, Floyd M, Ford JM, Galvin M, Gerlach JL, Grotzfeld RM, Herrgard S, Insko DE, Insko MA, Lai AG, Lélías JM, Mehta SA, Milanov ZV, Velasco AM, Wodicka LM, Patel HK, Zarrinkar PP, Lockhart DJ., *Nat. Biotechnol.* **2005**, *23*, 329-336. (b) Karaman, M.W. Herrgard S, Treiber DK, Gallant P, Atteridge CE, Campbell BT, Chan KW, Ciceri P, Davis MI, Edeen PT, Faraoni R, Floyd M, Hunt JP, Lockhart DJ, Milanov ZV, Morrison MJ, Pallares G, Patel HK, Pritchard S, Wodicka LM, Zarrinkar PP., *Nat. Biotechnol.*, **2008**, *26*, 127-32.
  - (3) Seeliger, M. A.; Young, M.; Henderson, M. N.; Pellicena, P.; King, D. S.; Falick, A. M.; Kuriyan, J., *Protein Sci* **2005**, *14*, (12), 3135-9.
  - (4) Otwinowski, Z.; Minor, W., *Macromolecular Crystallography, Pt A* **1997**, *276*, 307-326.
  - (5) W. Xu, A. Doshi, M. Lei, M.J. Eck and S.C. Harrison, *Mol. Cell*, **3**, **1999**, 629–638.
  - (6) McCoy, A. J.; Grosse-Kunstleve, R. W.; Storoni, L. C.; Read, R. J., *Acta Crystallographica Section D-Biological Crystallography* **2005**, *61*, 458-464.
  - (7) Collaborative Computational Project Number 4, The CCP4 suite: programs for protein crystallography, doi:10.1107/S09074444994003112. *Acta Crystallographica Section D* **1994**, *50*, (5), 760-763.
  - (8) Emsley, P.; Cowtan, K., *Acta Crystallographica Section D-Biological Crystallography* **2004**, *60*, 2126-2132.
  - (9) Brunger, A. T., *Nat Protoc* **2007**, *2*, (11), 2728-33.
  - (10) Brunger, A. T.; Adams, P. D.; Clore, G. M.; DeLano, W. L.; Gros, P.; Grosse-Kunstleve, R. W.; Jiang, J. S.; Kuszewski, J.; Nilges, M.; Pannu, N. S.; Read, R. J.; Rice, L. M.; Simonson, T.; Warren, G. L., *Acta Crystallographica Section D-Biological Crystallography* **1998**, *54*, 905-921.
  - (11) Haris, S.P; Zhang, Y; Bourdonnec, B.-L.; McCurdy, C.R.; Portoghese, P.S., *J.Med.Chem.*, **2007**, 3392-3396.
  - (12) Laquindanum, J.G.; Katz, H.E.; Lovinger, A.J., *JACS*, **1998**, *120*, 664-672.
